# Supplementary material
Source: PubMed Central journal article supplement (PMC3651445)
Supplement: 1303800110_pnas.201303800SI.pdf [file 1303800110_pnas.201303800SI.pdf]

# Supporting Information

Knutson et al. 10.1073/pnas.1303800110

## SI Materials and Methods

**Western Blotting.** Whole-cell lysates were prepared using a modified radioimmunoprecipitation assay (RIPA) buffer [10× RIPA Lysis Buffer (Millipore; 20-188), 0.1% SDS, protease minitab (Roche; 1836153)]. Cells were pelleted, washed with ice-cold PBS, resuspended in ice-cold RIPA buffer, and incubated on ice for 5 min. Lysates were sonicated three times for 10 s at 50% power, and then incubated on ice for 10 min. Lysates were centrifuged at maximum speed for 15 min at 4 °C in a table-top centrifuge. Protein concentrations for were determined by BCA assay (Pierce). Ten micrograms of each lysate were fractionated on 10–20% Tris-glycine gel (Bio-Rad), transferred using iBlot (7 min on program 3, using nitrocellulose transfer stacks), and probed with the following antibodies in Odyssey blocking buffer: SMARCB1 (CST; 8745), EZH2 (CST; 5246), and  $\beta$ -actin (CST; 3700).

**ELISA.** Histones were prepared in equivalent concentrations [0.5 ng/ $\mu$ L for H3 and 4 ng/ $\mu$ L for the trimethylated state of lysine 27 on H3 (H3K27Me3)] in coating buffer (PBS with 0.05% BSA). Sample or standard (100  $\mu$ L) was added in duplicate to two 96-well ELISA plates (Thermo Labsystems; Immulon 4HBX 3885). Histones isolated from G401 cells that were treated with DMSO or 10  $\mu$ mol/L EPZ-6438 (N-((4,6-dimethyl-2-oxo-1,2-dihydropyridin-3-yl)methyl)-5-(ethyl(tetrahydro-2H-pyran-4-yl)amino)-4-methyl-4'-(morpholinomethyl)-[1,1'-biphenyl]-3-carboxamide) for 4 d were added to control wells at the same histone concentration as the tumor histone samples. The plates were sealed and incubated overnight at 4 °C. The following day, plates were washed three times with 300  $\mu$ L per well PBST (PBS with 0.05% Tween 20; 10× PBST; KPL; 51-14-02) on a Bio-Tek plate washer. Plates were blocked with 300  $\mu$ L per well of diluent [PBS plus 2% (wt/vol) BSA plus 0.05% Tween 20], incubated at room temperature for 2 h, and washed three times with PBST. All antibodies were diluted in diluent. One hundred microliters per well anti-H3K27Me3 (CST; 9733; 50% glycerol stock, 1:1,000) or anti-total H3 (Abcam; ab1791; 50% glycerol stock, 1:10,000) were added to each plate. Plates were incubated for 90 min at room temperature and washed three times with PBST. One hundred microliters per well anti-Rb-IgG-HRP (Cell Signaling Technology; 7074) was added at 1:2,000 to the H3K27Me3 plate and at 1:6,000 to the H3 plate and incubated for 90 min at room temperature. Plates were

washed four times with PBST. For detection, 100  $\mu$ L per well 3,3',5,5'-tetramethylbenzidine substrate (BioFx Laboratories; TMBS) were added, and plates were incubated in the dark at room temperature for 5 min. Reaction was stopped with 100  $\mu$ L per well of 0.5 M H<sub>2</sub>SO<sub>4</sub>. Absorbance at 450 nm was read on SpectraMax M5 Microplate reader.

**Pharmacokinetic Analyses.** Dexamethasone was used as internal standard. An aliquot of 30- $\mu$ L plasma sample was added with 30  $\mu$ L of internal standard (dexamethasone, 1,000 ng/mL) and 150  $\mu$ L of acetonitrile. The mixture was vortexed for 5 min and centrifuged at 18,000  $\times$  g for 5 min. An aliquot of 2- $\mu$ L supernatant was injected for liquid chromatography with tandem mass spectrometry (LC-MS/MS) analysis (Q-trap 3200). For 10-fold diluted plasma samples, an aliquot of 3- $\mu$ L plasma sample was added with 27- $\mu$ L blank plasma, the dilution factor was 10, then added with 30  $\mu$ L of IS (dexamethasone, 1,000 ng/mL) and 150  $\mu$ L of acetonitrile. The mixture was vortexed for 5 min and centrifuged at 18,000  $\times$  g for 5 min. An aliquot of 2- $\mu$ L supernatant was injected for LC-MS/MS analysis. Tumor samples were homogenized on Beadbeater for 30 s with 3 $\times$  PBS (wt/vol) to obtain a tumor homogenate. An aliquot of 30- $\mu$ L tumor homogenate sample was added with 30  $\mu$ L of internal standard (dexamethasone, 1,000 ng/mL) and 150  $\mu$ L of acetonitrile. The mixture was vortexed for 5 min and centrifuged at 18,000  $\times$  g for 5 min. An aliquot of 2- $\mu$ L supernatant was injected for LC-MS/MS analysis.

**Gene Expression Analysis.** The following TaqMan primer/probe sets were used for quantitative PCR-based gene expression analyses:

| Gene          | AB no.        |
|---------------|---------------|
| MYC           | Hs00153408_m1 |
| EZH2          | Hs00172783_m1 |
| PTCH1         | Hs00181117_m1 |
| PROM1 (CD133) | Hs01009250_m1 |
| GLI1          | Hs01110766_m1 |
| DOCK4         | Hs00206807_m1 |
| PTPRK         | Hs00267788_m1 |
| BIN1          | Hs00184913_m1 |

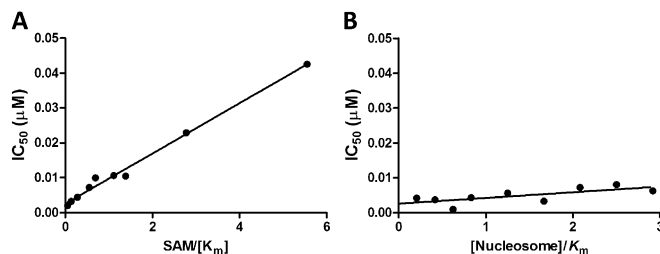

**Fig. S1.** Biochemical mechanism of action studies. The IC<sub>50</sub> value of EPZ-6438 increases with increasing SAM concentration (A) and is minimally affected by increasing oligonucleosome concentration (B), indicating SAM-competitive and nucleosome-noncompetitive mechanism of action.
